# Supplementary material
Source: publisher figshare collection journal article supplement (https://acs.figshare.com/ndownloader/files/4500709)
Supplement: Supplementary file 1 [file 4500709]

## Supporting Information

# Aptamer-Nanoparticle Strip Biosensor for Rapid and Sensitive Detection of Cancer Cells

Guodong Liu,<sup>\*,†,‡</sup> Xun Mao,<sup>‡</sup> Joseph A. Phillips,<sup>§</sup> Hui Xu,<sup>‡</sup> Weihong Tan,<sup>\*,§</sup> and Lingwen Zeng<sup>\*,†</sup>

Key Laboratory of Regenerative Biology, Guangzhou Institute of Biomedicine and Health, Chinese Academy of Sciences, Guangzhou, Guangdong, China 510663, Department of Chemistry and Molecular Biology, North Dakota State University, Fargo, North Dakota 58105, and Center for Research at Bio/Nano Interface, Department of Chemistry, Shands Cancer Center, Department of Physiology and Functional Genomics, UF Genetics Institute and McKnight Brain Institute, University of Florida, Gainesville, Florida 32611-7200

\* To whom correspondence should be addressed: [guodong.liu@ndsu.edu](mailto:guodong.liu@ndsu.edu), [tan@chem.ufl.edu](mailto:tan@chem.ufl.edu) and [zeng6@yahoo.com](mailto:zeng6@yahoo.com)

<sup>†</sup> Chinese Academy of Sciences.

<sup>‡</sup> North Dakota State University.

<sup>§</sup> University of Florida.

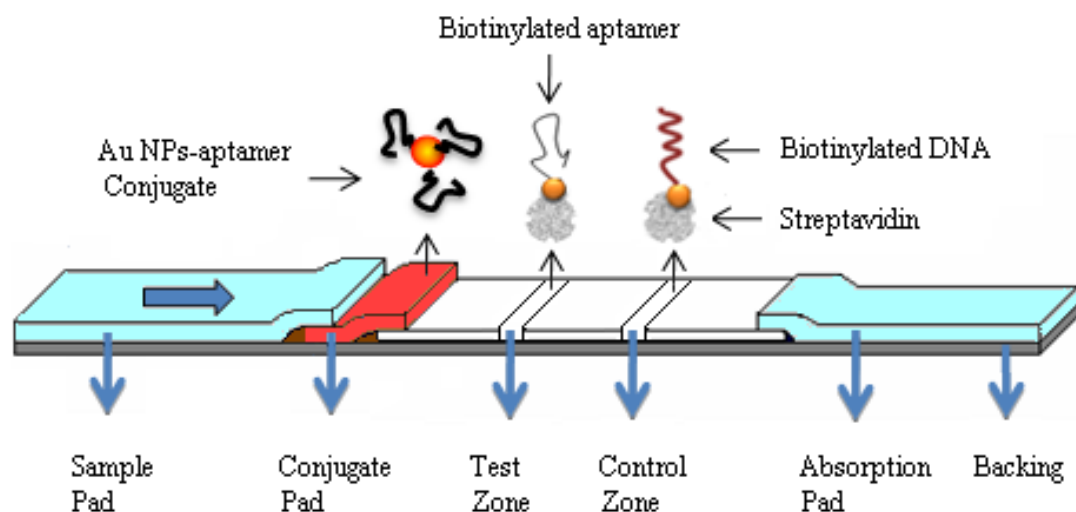

Fig. S1. Schematic diagram of aptamer-nanoparticle strip biosensor based on aptamer-functionalized gold nanoparticle probes and lateral flow test strip for detection of cancer cells.
